# Supplementary material for: Endothelial TGF-β signaling instructs smooth muscle cell development in the cardiac outflow tract
Source: eLife. 2020 Sep 29;9:e57603. doi: 10.7554/eLife.57603 (PMC7524555; doi:10.7554/eLife.57603)
Supplement: Figure 2—source data 1. — Related to Figure 2 and Figure 2—figure supplement 1. [file elife-57603-fig2-data1.xlsx]

## Sheet: EC vs surr.cells pSmad3 24 hpf
	Embryo n°	ECs	Surrounding cells	Ratio EC vs surr cells	Experiment n°			Number of values	19
	1	0.304354	0.150275	2.02531	1
	2	0.526571	0.372826	1.41238				Minimum	1.357
	3	0.50411	0.209242	2.40922				25% Percentile	1.622
	4	0.516638	0.318567	1.62175				Median	2.04
	5	0.642765	0.306873	2.09456				75% Percentile	2.22
	6	0.488758	0.2396	2.03989				Maximum	3.171
	7	0.62482	0.353193	1.76906	2
	8	0.366767	0.223963	1.63763				Mean	2.02
	9	0.388833	0.247841	1.56888				Std. Deviation	0.4652
	10	0.561334	0.303814	1.84762				Std. Error of Mean	0.1067
	11	0.325284	0.239674	1.35719
	12	0.387497	0.146308	2.64851				Lower 95% CI of mean	1.796
	13	0.479947	0.216207	2.21985				Upper 95% CI of mean	2.245
	14	0.695547	0.270579	2.57059
	15	0.399977	0.126125	3.17127	3			D'Agostino & Pearson omnibus normality test
	16	0.324235	0.148191	2.18795				K2	2.564
	17	0.341787	0.156385	2.18555				P value	0.2775
	18	0.405308	0.196988	2.05753				Passed normality test (alpha=0.05)?	Yes
	19	0.458717	0.29318	1.56463				P value summary	ns
	The values for each embryo derive from an average of 5-8 cells per each category
	The value for each cell has been normalized to the DAPI signal with this formula: p-Smad3 mean grey value/ DAPI mean grey value

## Sheet: EC vs surr.cells psmad3 75 hpf
	Embryo n°	ECs	Surrounding cells	Ratio EC vs surr cells	Experiment n°			Number of values	7
	1	0.80817	0.538262	1.50144	1
	2	0.873767	0.45776	1.90879				Minimum	0.5982
	3	0.792186	0.46379	1.70807				25% Percentile	0.6956
	4	0.913791	0.781203	1.16972	2			Median	0.8082
	5	0.695552	0.51795	1.34289				75% Percentile	0.9138
	6	0.598244	0.723721	0.826622				Maximum	0.9343
	7	0.934292	0.385662	2.42257	3
	8	0.802286	0.552621	1.45178				Mean	0.8023
								Std. Deviation	0.1212
								Std. Error of Mean	0.04581
								Lower 95% CI of mean	0.6902
								Upper 95% CI of mean	0.9144
								D'Agostino & Pearson omnibus normality test
								K2	N too small
								P value
								Passed normality test (alpha=0.05)?
								P value summary
	The values for each embryo derive from an average of 5-8 cells per each category
	The value for each cell has been normalized to the DAPI signal with this formula: p-Smad3 mean grey value/ DAPI mean grey value

## Sheet: EC OFT vs EC heart
	Embryo n°	EC OFT	EC heart	Ratio EC OFT/EC heart	Experiment n°		Number of values	17
	1	0.462182	0.33511	1.3792	1
	2	0.50411	0.290783	1.73363			Minimum	1.264
	3	0.516638	0.322434	1.60231			25% Percentile	1.388
	4	0.642765	0.372966	1.72339			Median	1.567
	5	0.488758	0.274014	1.78369			75% Percentile	1.821
	6	0.62482	0.263088	2.37495			Maximum	2.375
	7	0.366767	0.234086	1.5668	2
	8	0.388833	0.266577	1.45862			Mean	1.651
	9	0.561334	0.270357	2.07627			Std. Deviation	0.3321
	10	0.325284	0.257281	1.26431			Std. Error of Mean	0.08056
	11	0.387497	0.278439	1.39167
	12	0.695547	0.308111	2.25746			Lower 95% CI of mean	1.481
	13	0.479947	0.258323	1.85794			Upper 95% CI of mean	1.822
	14	0.399977	0.278143	1.43803	3
	15	0.324235	0.214392	1.51235			D'Agostino & Pearson omnibus normality test
	16	0.341787	0.246922	1.38419			K2	3.215
	17	0.405308	0.319731	1.26765			P value	0.2004
	18	0.458717	0.454251	1.00983			Passed normality test (alpha=0.05)?	Yes
							P value summary	ns
	The values for each embryo derive from an average of 5-8 cells per each category
	The value for each cell has been normalized to the DAPI signal with this formula: p-Smad3 mean grey value/ DAPI mean grey value

## Sheet: EC vs surr.cells pSmad15 24 hpf
	Embryo n°	ECs	Surrounding cells	Ratio EC vs surr cells	Experiment n°				Number of values	11
	1	0.293099	0.212663	1.37823	1
	2	0.293698	0.236788	1.24034					Minimum	0.9356
	3	0.401765	0.323893	1.24042					25% Percentile	1.152
	4	0.218459	0.214482	1.01854					Median	1.258
	5	0.325193	0.18912	1.7195	2				75% Percentile	1.452
	6	0.344911	0.368644	0.935622					Maximum	1.72
	7	0.336928	0.23209	1.45171
	8	0.193734	0.168154	1.15213	3				Mean	1.297
	9	0.337039	0.222092	1.51757					Std. Deviation	0.2232
	10	0.421356	0.310963	1.35501					Std. Error of Mean	0.06729
	11	0.22618	0.179746	1.25833
									Lower 95% CI of mean	1.147
									Upper 95% CI of mean	1.447
									D'Agostino & Pearson omnibus normality test
									K2	0.2087
									P value	0.9009
									Passed normality test (alpha=0.05)?	Yes
									P value summary	ns
	The values for each embryo derive from an average of 5-8 cells per each category
	The value for each cell has been normalized to the DAPI signal with this formula: p-Smad3 mean grey value/ DAPI mean grey value
