# Supplementary material for: Endothelial TGF-β signaling instructs smooth muscle cell development in the cardiac outflow tract
Source: eLife. 2020 Sep 29;9:e57603. doi: 10.7554/eLife.57603 (PMC7524555; doi:10.7554/eLife.57603)
Supplement: Figure 2—source data 2. — Related to Figure 2 and Figure 2—figure supplement 1. [file elife-57603-fig2-data2.xlsx]

## Sheet: pSmad3 24hpf
		Ecs		Surrounding cells								alk5+/+	alk5-/-	alk5+/+	alk5-/-
	Embryo n°	alk5+/+	alk5-/-	alk5+/+	alk5-/-		Experiment n°				Number of values	25	17	25	17
	1	0.304354	0.324603	0.150275	0.307062		1
	2	0.526571	0.337627	0.372826	0.230999		2				Minimum	0.2856	0.1412	0.1261	0.1138
	3	0.462182	0.381617	0.441267	0.283642		3				25% Percentile	0.3771	0.278	0.2013	0.1472
	4	0.50411	0.378072	0.209242	0.192665						Median	0.4622	0.3463	0.2478	0.1673
	5	0.516638	0.229475	0.318567	0.12081						75% Percentile	0.5255	0.374	0.3359	0.2265
	6	0.642765	0.327128	0.306873	0.162008						Maximum	0.7168	0.4445	0.5168	0.3306
	7	0.488758	0.36912	0.2396	0.222024
	8	0.62482	0.444477	0.353193	0.185747						Mean	0.4662	0.3226	0.267	0.1892
	9	0.366767	0.260023	0.223963	0.148172						Std. Deviation	0.1195	0.08419	0.09761	0.06489
	10	0.388833	0.42541	0.247841	0.146274						Std. Error of Mean	0.02389	0.02042	0.01952	0.01574
	11	0.561334	0.346728	0.303814	0.150788
	12	0.325284	0.296033	0.239674	0.172735						Lower 95% CI of mean	0.4169	0.2793	0.2267	0.1559
	13	0.387497	0.352929	0.146308	0.151203						Upper 95% CI of mean	0.5155	0.3659	0.3073	0.2226
	14	0.479947	0.141201	0.216207	0.130803
	15	0.695547	0.369931	0.270579	0.330643						D'Agostino & Pearson omnibus normality test
	16	0.716848	0.346278	0.358259	0.167338						K2	1.316	3.813	2.761	3.965
	17	0.399977	0.153744	0.126125	0.113778						P value	0.5179	0.1486	0.2514	0.1378
	18	0.324235		0.148191							Passed normality test (alpha=0.05)?	Yes	Yes	Yes	Yes
	19	0.341787		0.156385							P value summary	ns	ns	ns	ns
	20	0.405308		0.196988							Unpaired t test
	21	0.458717		0.29318							P value	0.0001		0.0064
	22	0.524422		0.366802							P value summary	***		**
	23	0.409807		0.205627							Significantly different? (P < 0.05)	Yes		Yes
	24	0.513479		0.516762							One- or two-tailed P value?	Two-tailed		Two-tailed
	25	0.285586		0.267169							t, df	t=4,279 df=40		t=2,877 df=40

## Sheet: pSmad158 24 hpf
		Ecs		Surrounding cells			Experiment n°				alk5+/+	alk5-/-	alk5+/+	alk5-/-
	Embryo n°	alk5+/+	alk5-/-	alk5+/+	alk5-/-		1			Number of values	11	10	11	10
	1	0.293099	0.220534	0.212663	0.20322		2
	2	0.293698	0.29192	0.236788	0.447611		3			Minimum	0.1937	0.2205	0.1682	0.2032
	3	0.401765	0.303154	0.323893	0.214141					25% Percentile	0.2262	0.275	0.1891	0.2131
	4	0.218459	0.395321	0.214482	0.325439					Median	0.3252	0.3453	0.2221	0.2924
	5	0.325193	0.460083	0.18912	0.311033					75% Percentile	0.3449	0.4115	0.311	0.4123
	6	0.344911	0.342486	0.368644	0.405009					Maximum	0.4214	0.5461	0.3686	0.4476
	7	0.336928	0.546114	0.23209	0.434354
	8	0.193734	0.348039	0.168154	0.273843					Mean	0.3084	0.3508	0.2417	0.3086
	9	0.337039	0.376395	0.222092	0.210081					Std. Deviation	0.07292	0.1009	0.06463	0.09303
	10	0.421356	0.224051	0.310963	0.261433					Std. Error of Mean	0.02199	0.0319	0.01949	0.02942
	11	0.22618		0.179746
										Lower 95% CI of mean	0.2594	0.2787	0.1983	0.2421
										Upper 95% CI of mean	0.3574	0.423	0.2851	0.3752
										D'Agostino & Pearson omnibus normality test
										K2	0.3185	0.8963	2.131	1.919
										P value	0.8528	0.6388	0.3445	0.3832
										Passed normality test (alpha=0.05)?	Yes	Yes	Yes	Yes
										P value summary	ns	ns	ns	ns
										Unpaired t test
										P value	0.28		0.0687
										P value summary	ns		ns
										Significantly different? (P < 0.05)	No		No
										One- or two-tailed P value?	Two-tailed		Two-tailed
										t, df	t=1,112 df=19		t=1,930 df=19
