# Supplementary material for: Endothelial TGF-β signaling instructs smooth muscle cell development in the cardiac outflow tract
Source: eLife. 2020 Sep 29;9:e57603. doi: 10.7554/eLife.57603 (PMC7524555; doi:10.7554/eLife.57603)
Supplement: Supplementary file 1. [file elife-57603-supp1.xlsx]

## Sheet: Down genes Inhibitor <-1 log2FC
Ensembl gene id	Ensembl gene	log2FoldChange Alk5 Inhib/DMSO	padj
ENSDARG00000078622	scpp5	-8.89194	5.91121e-14
ENSDARG00000056012	eve1	-6.07225	3.42003e-05
ENSDARG00000093905	BX323559.3	-6.05661	0.00204678
ENSDARG00000090416	scpp1	-5.66537	0.0199618
ENSDARG00000070011	si:ch211-167j6.4	-5.50099	9.08465e-06
ENSDARG00000042753	cts12	-5.29405	3.27141e-14
ENSDARG00000013051	zgc:158412	-4.33016	9.12367e-08
ENSDARG00000059369	si:ch1073-15f12.3	-4.06725	0.000291143
ENSDARG00000044276	spp1	-3.89783	1.84598e-05
ENSDARG00000079486	fam20a	-3.88862	7.76076e-08
ENSDARG00000052846	fsta	-3.45668	2.46962e-47
ENSDARG00000070430	chtopb	-3.43203	7.82469e-05
ENSDARG00000099880	sp6	-3.25824	8.30475e-20
ENSDARG00000070428	si:dkey-239n17.4	-3.18349	1.5658e-30
ENSDARG00000112739	CR847970.1	-3.17858	0.00671433
ENSDARG00000087646	runx1	-3.11104	6.49455e-07
ENSDARG00000101322	tfr1a	-3.06982	1.13308e-28
ENSDARG00000041799	cx43	-2.91409	1.64744e-62
ENSDARG00000044132	ogn	-2.88947	1.13819e-41
ENSDARG00000060549	ecel1	-2.88707	1.26006e-08
ENSDARG00000071091	chrm3a	-2.88492	0.0256864
ENSDARG00000076933	aldh1a3	-2.87516	0.0102342
ENSDARG00000017174	dlx2b	-2.83936	4.18303e-12
ENSDARG00000077817	cxxc4	-2.83689	8.41236e-08
ENSDARG00000071549	ecm2	-2.80596	3.74337e-36
ENSDARG00000041115	cnfn	-2.78283	0.00313053
ENSDARG00000011635	scxb	-2.78062	0.00389469
ENSDARG00000071462	lama3	-2.72484	0.0143623
ENSDARG00000027065	slc38a3a	-2.68926	1.04239e-10
ENSDARG00000074033	adamtsl2	-2.68777	1.19444e-15
ENSDARG00000023933	skila	-2.68556	1.95895e-13
ENSDARG00000069327	nkx3.3	-2.62458	5.38437e-25
ENSDARG00000004447	aplnr2	-2.60864	0.0210428
ENSDARG00000054941	ldlrad4b	-2.60695	0.00122616
ENSDARG00000039999	slc13a5b	-2.56979	0.00911713
ENSDARG00000051823	hyal4	-2.56935	2.04364e-12
ENSDARG00000104651	msx2a	-2.48224	5.03472e-07
ENSDARG00000055175	c1qtnf6a	-2.46813	1.38182e-07
ENSDARG00000095347	si:dkeyp-72h1.1	-2.46735	0.00310552
ENSDARG00000001993	myhb	-2.41088	1.65309e-05
ENSDARG00000103184	PAMR1	-2.41038	1.1973e-05
ENSDARG00000070597	prelp	-2.40913	5.2313e-09
ENSDARG00000020114	slc20a1a	-2.30488	5.09997e-15
ENSDARG00000070683	dkk3b	-2.28772	2.58486e-11
ENSDARG00000074808	megf6b	-2.25735	1.89641e-17
ENSDARG00000053362	cilp	-2.24865	3.31403e-26
ENSDARG00000020057	bmpr2b	-2.24555	8.54853e-12
ENSDARG00000075555	adamts17	-2.22112	3.03952e-06
ENSDARG00000102911	iffo2b	-2.19289	5.83613e-05
ENSDARG00000112287	zgc:66156	-2.15511	9.5713e-07
ENSDARG00000089586	ncam3	-2.14314	2.15887e-06
ENSDARG00000022904	skilb	-2.11536	2.54876e-06
ENSDARG00000037403	si:dkey-4p15.3	-2.10584	0.000567313
ENSDARG00000060149	ablim1a	-2.1014	0.0142008
ENSDARG00000078362	zmp:0000000846	-2.09626	2.40723e-08
ENSDARG00000013687	cilp2	-2.09332	0.00437097
ENSDARG00000060123	ca16b	-2.08913	1.97716e-09
ENSDARG00000112019	CABZ01065423.1	-2.07387	0.0156061
ENSDARG00000070857	si:dkey-32e6.6	-2.03133	0.0208604
ENSDARG00000111323	si:ch211-51i16.1	-2.00733	7.82469e-05
ENSDARG00000093572	lamc3	-1.99805	8.11856e-16
ENSDARG00000040065	gja5a	-1.99272	1.00071e-05
ENSDARG00000039325	pmepa1	-1.97963	0.00728844
ENSDARG00000061549	foxo1b	-1.97247	0.000480179
ENSDARG00000076952	fer1l4	-1.95874	0.0367682
ENSDARG00000077275	crispld1a	-1.956	4.66887e-06
ENSDARG00000035695	scxa	-1.95439	1.74911e-08
ENSDARG00000003395	col4a3	-1.94715	0.0413027
ENSDARG00000016750	abcc6a	-1.93491	0.0262603
ENSDARG00000013730	slc4a4a	-1.92478	1.18906e-05
ENSDARG00000001870	atp1a1a.4	-1.90713	1.75216e-13
ENSDARG00000062621	satb1b	-1.90072	0.0241174
ENSDARG00000012789	plek2	-1.8916	0.00945644
ENSDARG00000029689	tkta	-1.87918	0.0016996
ENSDARG00000030154	pak7	-1.8779	0.00841106
ENSDARG00000056029	cyp26c1	-1.86698	2.25234e-07
ENSDARG00000002445	prdm1a	-1.85433	8.9336e-12
ENSDARG00000034375	chst11	-1.85171	1.46746e-05
ENSDARG00000001781	tspan11	-1.82146	0.0111789
ENSDARG00000062562	egln2	-1.81682	0.00742373
ENSDARG00000037917	itga3a	-1.78362	2.05597e-08
ENSDARG00000056594	irx1b	-1.78213	8.37492e-10
ENSDARG00000019516	sp7	-1.77648	1.41982e-09
ENSDARG00000033845	igsf9ba	-1.77395	0.0457703
ENSDARG00000086703	si:dkey-126g1.7	-1.76518	0.00501562
ENSDARG00000101090	pappaa	-1.75409	0.00980343
ENSDARG00000012060	thbs3b	-1.75163	3.04652e-14
ENSDARG00000005394	dnmt3aa	-1.73607	0.00936212
ENSDARG00000013460	wfikkn2a	-1.72073	0.0291736
ENSDARG00000103311	FBLN1	-1.66757	1.54219e-07
ENSDARG00000008034	skib	-1.64837	2.11308e-15
ENSDARG00000092833	CR318588.2	-1.6368	0.00528621
ENSDARG00000008772	cacng1a	-1.63639	4.88311e-11
ENSDARG00000070555	ldlrad4a	-1.62649	2.33031e-12
ENSDARG00000100307	adamts5	-1.61294	0.00115055
ENSDARG00000043309	obscna	-1.60916	0.0100801
ENSDARG00000063079	ago3b	-1.60429	4.25781e-05
ENSDARG00000110596	CABZ01079179.1	-1.60055	0.00311164
ENSDARG00000061099	nfasca	-1.59447	2.04777e-07
ENSDARG00000069715	foxi2	-1.58967	7.85691e-05
ENSDARG00000014246	jag2a	-1.5881	0.000102778
ENSDARG00000004539	ptgs2a	-1.58267	3.91501e-14
ENSDARG00000035918	bzw2	-1.58119	6.59215e-09
ENSDARG00000039273	fbln5	-1.57654	2.71103e-15
ENSDARG00000073883	clstn3	-1.56996	0.0394738
ENSDARG00000088615	ltb4r2a	-1.56064	0.01521
ENSDARG00000100449	BX322631.1	-1.54372	1.42694e-05
ENSDARG00000093899	BX510657.1	-1.53611	1.90807e-09
ENSDARG00000007398	lrrk1	-1.52506	0.0389847
ENSDARG00000042259	tgfbr1b	-1.52426	0.00050048
ENSDARG00000078468	fap	-1.51278	2.49942e-12
ENSDARG00000020072	thbs4b	-1.50864	7.17375e-11
ENSDARG00000039964	fgfbp2a	-1.50648	2.88455e-07
ENSDARG00000096804	si:dkey-219e21.4	-1.49896	0.0264953
ENSDARG00000055644	prss60.2	-1.49208	4.1031e-07
ENSDARG00000098345	mamdc2a	-1.48467	0.00931774
ENSDARG00000116556	im:7142702	-1.47506	9.01151e-05
ENSDARG00000115540	cacng4a	-1.47124	0.0207957
ENSDARG00000102340	ptn	-1.46714	0.00117618
ENSDARG00000099088	edar	-1.46487	3.74998e-05
ENSDARG00000074363	TTC9	-1.46427	0.00911713
ENSDARG00000052826	runx3	-1.46415	2.95766e-06
ENSDARG00000098431	COMP	-1.45001	2.0117e-11
ENSDARG00000116353	CABZ01071171.1	-1.44511	9.61228e-05
ENSDARG00000099390	lama2	-1.43949	0.00941777
ENSDARG00000055854	nr4a3	-1.42865	0.000156471
ENSDARG00000095192	BX957317.1	-1.42801	0.0422034
ENSDARG00000103286	kcnk4a	-1.42432	0.00320886
ENSDARG00000087863	cd44a	-1.42212	0.00866371
ENSDARG00000056087	ecrg4a	-1.42061	0.000168447
ENSDARG00000042492	si:dkey-250d21.1	-1.41445	0.0169505
ENSDARG00000077231	vwf	-1.41206	2.38315e-06
ENSDARG00000005716	olfml2ba	-1.38721	4.07762e-07
ENSDARG00000054619	fras1	-1.38487	1.37123e-16
ENSDARG00000075441	vwa2	-1.38018	0.00215166
ENSDARG00000063594	hipk1a	-1.37562	0.0494392
ENSDARG00000102414	myhz1.1	-1.36587	1.67487e-08
ENSDARG00000069473	frem1a	-1.35798	6.01227e-10
ENSDARG00000030832	otofa	-1.3452	0.038262
ENSDARG00000071017	nt5e	-1.33321	0.0426056
ENSDARG00000059363	tgfbr2a	-1.325	0.0422775
ENSDARG00000013526	svep1	-1.32041	1.45762e-10
ENSDARG00000102879	myt1b	-1.31589	0.0180844
ENSDARG00000078440	ccdc88aa	-1.31417	0.0233967
ENSDARG00000073820	zgc:174917	-1.3073	0.00146915
ENSDARG00000103969	smyhc2	-1.28784	4.22597e-13
ENSDARG00000096932	si:ch211-37e10.2	-1.27612	1.68297e-06
ENSDARG00000013653	adgrl4	-1.27343	0.000682051
ENSDARG00000077852	samd11	-1.27205	4.44261e-07
ENSDARG00000053835	plekhh1	-1.26758	4.07762e-07
ENSDARG00000021151	ptpreb	-1.26586	0.0387492
ENSDARG00000017369	sema3d	-1.26404	4.1031e-07
ENSDARG00000074309	cnnm4b	-1.2626	0.0376821
ENSDARG00000068567	shha	-1.26172	2.52186e-10
ENSDARG00000068191	cdh15	-1.257	4.9198e-07
ENSDARG00000077826	efcc1	-1.2507	4.8115e-06
ENSDARG00000062510	bcl11ba	-1.25027	9.09528e-07
ENSDARG00000062579	kremen1	-1.23882	0.0289205
ENSDARG00000033840	fat3a	-1.23392	0.000387022
ENSDARG00000110040	CABZ01092781.1	-1.22683	8.21245e-05
ENSDARG00000061915	git2a	-1.22408	1.46683e-05
ENSDARG00000114182	mkxb	-1.2184	0.000592793
ENSDARG00000087910	dact3a	-1.21791	4.57336e-06
ENSDARG00000073711	mmrn2b	-1.21118	2.37083e-06
ENSDARG00000079327	hmcn2	-1.2109	1.40208e-12
ENSDARG00000059601	map1aa	-1.20383	0.000117651
ENSDARG00000010478	hsp90aa1.1	-1.20288	9.01257e-13
ENSDARG00000037790	pvalb8	-1.20177	0.000105181
ENSDARG00000053569	sox3	-1.20155	8.4912e-06
ENSDARG00000100041	CU571069.1	-1.19724	0.0488196
ENSDARG00000057143	nradd	-1.19542	0.00017859
ENSDARG00000060678	ndst2b	-1.1925	0.0279595
ENSDARG00000013057	hoxb5a	-1.18762	1.54447e-06
ENSDARG00000076357	CABZ01102039.1	-1.18643	2.36331e-05
ENSDARG00000062103	ankrd24	-1.18271	0.000489921
ENSDARG00000056379	si:ch73-86n18.1	-1.18204	0.000184337
ENSDARG00000061896	slco2a1	-1.17937	0.000630299
ENSDARG00000075284	kansl1l	-1.17702	0.0395491
ENSDARG00000061830	prss12	-1.17496	0.0018927
ENSDARG00000032990	plxnb3	-1.17409	0.0353629
ENSDARG00000076020	pappa2	-1.16997	0.0463235
ENSDARG00000038067	smurf2	-1.16946	1.74911e-08
ENSDARG00000036985	plxnb2b	-1.16776	0.0378643
ENSDARG00000055395	foxq1b	-1.1628	0.0006484
ENSDARG00000089235	tspearb	-1.16211	0.0093922
ENSDARG00000091116	pkhd1l1	-1.15587	2.71176e-08
ENSDARG00000038867	shhb	-1.15119	2.11369e-08
ENSDARG00000029457	cacna1sa	-1.15097	0.00805562
ENSDARG00000079752	col6a4a	-1.14961	3.35244e-13
ENSDARG00000070141	si:ch211-191i18.2	-1.13706	0.00324777
ENSDARG00000093799	setbp1	-1.12827	0.000435891
ENSDARG00000020811	efemp2b	-1.12593	0.00642621
ENSDARG00000060372	plxna2	-1.12374	0.000899343
ENSDARG00000103207	rab11fip4b	-1.11698	0.034272
ENSDARG00000012506	rnpep	-1.11545	0.00320886
ENSDARG00000043818	si:ch211-119c20.2	-1.11509	2.51758e-05
ENSDARG00000038305	vgll3	-1.11453	0.0335645
ENSDARG00000077304	erg	-1.10853	0.0137505
ENSDARG00000042151	skia	-1.10717	4.89164e-08
ENSDARG00000100791	tril	-1.107	0.00049254
ENSDARG00000099045	cacnb2a	-1.09743	0.000469965
ENSDARG00000061040	pum2	-1.09485	0.00196153
ENSDARG00000052905	zgc:165423	-1.09449	0.000836479
ENSDARG00000042934	ctgfa	-1.0933	4.04788e-08
ENSDARG00000003872	ccdc102a	-1.09168	1.15006e-06
ENSDARG00000003259	loxa	-1.08448	0.00116551
ENSDARG00000059473	kank4	-1.07822	0.00163951
ENSDARG00000037677	fgf24	-1.07797	0.000805211
ENSDARG00000070913	sox2	-1.07416	8.37477e-08
ENSDARG00000034801	mylka	-1.07342	0.000572183
ENSDARG00000093931	rflnb	-1.0715	0.000842464
ENSDARG00000055575	pcolce2b	-1.07047	0.0484131
ENSDARG00000011422	ryr1a	-1.0701	0.000169424
ENSDARG00000042249	FRMD4A	-1.06591	0.00020554
ENSDARG00000038672	tcf7	-1.06392	0.044287
ENSDARG00000024546	pla2g4aa	-1.0634	0.000674106
ENSDARG00000093316	adgrf8	-1.06325	0.0105864
ENSDARG00000033616	selenon	-1.06104	1.19405e-07
ENSDARG00000034307	chrne	-1.05968	0.0057848
ENSDARG00000056929	kdm6bb	-1.05881	1.61967e-07
ENSDARG00000102279	zmiz1b	-1.05034	0.0204712
ENSDARG00000042552	cacna1sb	-1.04715	0.00221676
ENSDARG00000004232	dlb	-1.0465	0.000123585
ENSDARG00000045316	map7d2b	-1.04628	0.0327059
ENSDARG00000006901	si:ch1073-459j12.1	-1.03914	1.9164e-09
ENSDARG00000060927	si:ch211-136a13.1	-1.0352	0.000957607
ENSDARG00000061544	ano6	-1.0342	0.00759866
ENSDARG00000073684	quo	-1.03352	3.03435e-07
ENSDARG00000068888	klhl41a	-1.0309	0.00162657
ENSDARG00000061699	sipa1l3	-1.0296	0.000206993
ENSDARG00000042329	si:dkey-91m11.5	-1.02928	0.0367682
ENSDARG00000053481	entpd5a	-1.02434	0.0347148
ENSDARG00000021405	chd3	-1.02288	0.0136546
ENSDARG00000099352	si:rp71-62i8.1	-1.01726	0.0228992
ENSDARG00000063075	soga1	-1.01483	4.8936e-06
ENSDARG00000093444	si:dkey-106l3.7	-1.0114	0.0338825
ENSDARG00000032765	net1	-1.00935	2.68456e-07
ENSDARG00000076964	cables2a	-1.00845	0.0373978
ENSDARG00000015686	bmp6	-0.999803	0.0104241
ENSDARG00000079011	col17a1b	-0.999583	0.000415735
ENSDARG00000006757	klhl41b	-0.99774	8.21225e-07

## Sheet: Up genes Inhibitor >1 log2FC
Ensembl gene id	Ensembl gene	log2FoldChange Alk5 Inhib/DMSO	padj
ENSDARG00000001721	oc90	5.6997	0.0100218
ENSDARG00000030980	csrp1b	4.98482	0.00169896
ENSDARG00000062448	skor1b	4.39445	1.49969e-11
ENSDARG00000006602	chrna2a	4.31928	0.000215803
ENSDARG00000057598	s100b	3.6516	6.24573e-08
ENSDARG00000090635	kcnj1a.4	3.5123	0.00183805
ENSDARG00000104654	leap2	3.46618	0.00389469
ENSDARG00000038424	si:dkey-8k3.2	3.44007	8.39376e-15
ENSDARG00000086248	kcnj1a.3	3.40883	0.000103142
ENSDARG00000005392	slc5a5	3.15357	5.69989e-21
ENSDARG00000045408	tagln	3.08067	1.70506e-27
ENSDARG00000101990	CU571315.3	3.01994	0.0359578
ENSDARG00000031952	mb	2.84637	5.12877e-40
ENSDARG00000040306	otomp	2.80533	0.0018927
ENSDARG00000003203	rhcga	2.78654	1.08627e-21
ENSDARG00000058379	otpb	2.78027	0.00996456
ENSDARG00000036505	syt4	2.75632	0.00680024
ENSDARG00000101077	SCTR	2.75584	0.0133867
ENSDARG00000018351	hpda	2.7445	1.60914e-05
ENSDARG00000060439	clcn2c	2.69526	0.0130886
ENSDARG00000098810	zgc:194678	2.68108	0.00941777
ENSDARG00000055132	lrfn4a	2.66667	0.0176529
ENSDARG00000100287	SLA	2.62276	0.0310885
ENSDARG00000076462	ndnfl	2.60174	6.92768e-08
ENSDARG00000009823	pou3f1	2.57146	0.000491825
ENSDARG00000097208	C11orf96	2.55987	7.38456e-05
ENSDARG00000014967	g6pcb	2.5508	0.000298114
ENSDARG00000075500	CT737125.2	2.53986	0.0213228
ENSDARG00000078522	si:ch211-80h18.1	2.5211	0.000615093
ENSDARG00000009922	dmbx1a	2.51426	0.011944
ENSDARG00000044433	sned1	2.49025	3.31621e-59
ENSDARG00000044501	viml	2.47695	0.00213181
ENSDARG00000105113	galr2b	2.39222	0.00854181
ENSDARG00000059294	marco	2.39221	0.0184843
ENSDARG00000041433	si:dkey-7c18.24	2.39033	1.46683e-05
ENSDARG00000012381	hsc70	2.34342	0.00386068
ENSDARG00000045141	aqp8a.1	2.33489	1.89022e-07
ENSDARG00000097503	si:ch73-288o11.5	2.31907	0.0172256
ENSDARG00000079446	FAM19A3	2.30708	0.00621112
ENSDARG00000078052	emilin3a	2.29786	8.73017e-40
ENSDARG00000113820	cyp46a1.4	2.2904	0.0177305
ENSDARG00000099870	tnni4a	2.2703	0.00343201
ENSDARG00000045982	si:ch73-55i23.1	2.26608	2.51758e-05
ENSDARG00000009160	kmo	2.22113	0.0191598
ENSDARG00000034522	rab6ba	2.21961	0.00864023
ENSDARG00000004592	gpr22a	2.1758	7.16567e-07
ENSDARG00000075189	cntnap5b	2.1745	6.06973e-11
ENSDARG00000079782	myh7l	2.14611	1.80878e-27
ENSDARG00000061819	wscd2	2.13908	0.0201994
ENSDARG00000104989	wnk2	2.12959	0.0493937
ENSDARG00000097523	si:ch73-364h19.1	2.09952	0.000324898
ENSDARG00000104999	CT027980.1	2.08905	1.32592e-07
ENSDARG00000070078	abcb11b	2.08215	1.40496e-06
ENSDARG00000002933	gbx2	2.05335	0.000126263
ENSDARG00000038655	ajap1	2.04827	0.0228992
ENSDARG00000024831	crhbp	2.03328	0.0207876
ENSDARG00000071596	neto1l	2.02473	0.000323542
ENSDARG00000074671	nptx1l	2.00775	8.07575e-12
ENSDARG00000038025	cbx7a	2.00748	1.79059e-06
ENSDARG00000025855	camk2n1a	2.00705	9.41504e-05
ENSDARG00000071235	si:ch211-117c9.5	1.99759	0.0102573
ENSDARG00000095863	afp4	1.99142	0.000637029
ENSDARG00000038941	ppp1r1c	1.94103	5.36638e-09
ENSDARG00000062479	vcam1b	1.92747	1.73049e-18
ENSDARG00000077428	camta1a	1.92314	0.000744048
ENSDARG00000056795	serpine1	1.90322	6.8507e-14
ENSDARG00000058647	hck	1.89473	0.0025739
ENSDARG00000045180	acta2	1.88302	3.91523e-22
ENSDARG00000104107	nkx2.4b	1.86179	0.0362157
ENSDARG00000016771	tfa	1.84259	1.83132e-16
ENSDARG00000079564	myh7	1.79445	2.76508e-28
ENSDARG00000059391	gyg1b	1.79156	0.000133537
ENSDARG00000089060	kcnj1a.5	1.78494	0.0134355
ENSDARG00000044935	hpdb	1.78195	0.000510517
ENSDARG00000101393	si:dkey-31g6.6	1.78063	0.0202586
ENSDARG00000023609	AL845324.1	1.77106	0.000480179
ENSDARG00000099793	cspg5b	1.76166	0.032045
ENSDARG00000093303	ifitm1	1.74201	0.00117618
ENSDARG00000035095	tdgf1	1.73304	0.000133315
ENSDARG00000037498	gria3b	1.72743	1.74069e-07
ENSDARG00000045594	shisal1a	1.71956	0.00125741
ENSDARG00000101095	cpne4a	1.70985	0.03374
ENSDARG00000087873	eevs	1.69509	1.56437e-05
ENSDARG00000103277	cyp24a1	1.69422	0.000388705
ENSDARG00000006598	sgk2b	1.69074	0.00207061
ENSDARG00000061517	lrp1bb	1.67221	0.000132591
ENSDARG00000045612	lrrc10	1.6498	3.07787e-07
ENSDARG00000020758	tmem178	1.64572	9.09528e-07
ENSDARG00000025504	gucy2f	1.63245	0.0156708
ENSDARG00000079586	gabrb2	1.63002	0.0089138
ENSDARG00000017299	fabp11a	1.6129	3.88283e-11
ENSDARG00000003533	col8a1b	1.6101	0.00034051
ENSDARG00000030265	scdb	1.60568	1.21282e-07
ENSDARG00000098315	cyp1a	1.59156	2.2647e-10
ENSDARG00000068947	si:ch211-264e16.1	1.5882	2.25719e-10
ENSDARG00000109848	FO681286.1	1.58778	0.000632204
ENSDARG00000052958	nppb	1.58596	2.79036e-14
ENSDARG00000011602	si:dkeyp-117h8.2	1.58007	0.00777384
ENSDARG00000007184	zbtb16a	1.56141	6.55423e-18
ENSDARG00000113599	hbbe1.1	1.55512	1.15476e-09
ENSDARG00000025679	comtb	1.5531	0.00657989
ENSDARG00000025089	loxl4	1.54693	4.21297e-10
ENSDARG00000020292	si:ch211-254n4.3	1.54001	0.00170162
ENSDARG00000113533	CABZ01074363.1	1.53653	0.0260782
ENSDARG00000090268	krtt1c19e	1.53149	5.53152e-20
ENSDARG00000108683	FITM1	1.5314	0.0292967
ENSDARG00000102506	lrp2a	1.52536	4.73276e-07
ENSDARG00000061665	hcn2b	1.52094	9.0435e-07
ENSDARG00000053475	ngb	1.52031	0.00740514
ENSDARG00000017429	sphkap	1.51786	0.0336034
ENSDARG00000011239	ppp1r14aa	1.51678	1.62538e-06
ENSDARG00000087318	CR382283.1	1.5139	0.000203686
ENSDARG00000069404	CR926459.1	1.51268	3.88583e-10
ENSDARG00000011400	tnnc1a	1.51096	0.0146352
ENSDARG00000079876	CU855878.1	1.50989	0.0228992
ENSDARG00000059368	gria4b	1.50421	0.00458332
ENSDARG00000058631	CABZ01030107.1	1.49815	0.00632051
ENSDARG00000043907	fgf11b	1.49344	0.0465317
ENSDARG00000039173	ctslb	1.49103	0.00144785
ENSDARG00000037921	gng13b	1.4859	0.000668801
ENSDARG00000011615	mybpc3	1.47913	7.6647e-16
ENSDARG00000094815	CU179758.1	1.47711	0.0363637
ENSDARG00000029039	zdhhc23a	1.46549	0.0306254
ENSDARG00000018004	nkx2.5	1.46078	4.10004e-08
ENSDARG00000098435	BX005003.1	1.45362	0.000307049
ENSDARG00000100697	FQ323156.1	1.45264	5.88776e-06
ENSDARG00000021889	gja3	1.44884	0.0413409
ENSDARG00000025131	lbx2	1.44353	2.77582e-08
ENSDARG00000036344	calb2b	1.44047	0.0124693
ENSDARG00000098809	snap91	1.43344	0.0153277
ENSDARG00000035120	gldc	1.43015	2.28484e-05
ENSDARG00000093936	si:dkeyp-1h4.6	1.4216	0.00969372
ENSDARG00000024433	pvalb4	1.42109	0.000563636
ENSDARG00000115956	CABZ01044281.1	1.41705	2.38395e-06
ENSDARG00000031420	wt1a	1.41552	0.000111992
ENSDARG00000010008	vim	1.41301	2.52991e-08
ENSDARG00000032976	cmlc1	1.39291	9.64393e-11
ENSDARG00000088711	lgals1l1	1.38699	5.43018e-13
ENSDARG00000007490	adrb1	1.38646	0.0163008
ENSDARG00000056248	si:dkey-183i3.5	1.3778	2.10814e-08
ENSDARG00000075133	adgrb1a	1.37115	1.85476e-05
ENSDARG00000018856	dclk1a	1.36837	0.0174706
ENSDARG00000069439	ptgdsa	1.36488	0.00682635
ENSDARG00000040123	zfpm2a	1.36172	6.45919e-05
ENSDARG00000002204	hspb11	1.35777	0.000478673
ENSDARG00000000503	stx1b	1.34768	0.0316019
ENSDARG00000035891	acana	1.33843	2.33031e-12
ENSDARG00000020084	tg	1.334	1.95351e-13
ENSDARG00000101831	irx1a	1.3301	0.000168447
ENSDARG00000092281	flnb	1.32629	1.96944e-10
ENSDARG00000058005	hgd	1.32305	1.93078e-06
ENSDARG00000041589	adprhl1	1.31995	2.22995e-05
ENSDARG00000078211	espnla	1.31766	0.0499645
ENSDARG00000092383	snorc	1.30771	1.49007e-05
ENSDARG00000104801	tubb6	1.3017	0.00384518
ENSDARG00000020610	tnnt2a	1.29809	8.14385e-14
ENSDARG00000052437	mia	1.29721	0.0243472
ENSDARG00000074582	gfra4b	1.29632	4.8936e-06
ENSDARG00000015263	adma	1.29611	2.44336e-05
ENSDARG00000057113	c6	1.28633	1.58626e-09
ENSDARG00000018418	pth1rb	1.28526	2.54121e-05
ENSDARG00000077176	zgc:174888	1.28368	2.15887e-06
ENSDARG00000091996	si:ch211-117m20.5	1.28351	1.09079e-16
ENSDARG00000070266	spock3	1.28127	1.47033e-10
ENSDARG00000099238	rasd4	1.26554	0.0132501
ENSDARG00000019096	myl7	1.26515	5.92264e-11
ENSDARG00000035309	entpd3	1.2644	0.000737201
ENSDARG00000014554	ppp1r3cb	1.25766	1.0919e-06
ENSDARG00000052708	tnni1b	1.25361	1.4326e-09
ENSDARG00000052917	si:ch211-202f3.3	1.25332	3.46369e-09
ENSDARG00000045051	slc16a3	1.24727	0.0325036
ENSDARG00000076011	si:ch211-149b19.3	1.24143	4.83156e-05
ENSDARG00000053617	camk2a	1.23924	0.00606378
ENSDARG00000070578	edn2	1.23433	3.2865e-05
ENSDARG00000043457	gapdh	1.23378	6.71359e-10
ENSDARG00000006110	chrd	1.22906	0.00604537
ENSDARG00000103937	ndrg4	1.22494	2.17239e-08
ENSDARG00000105408	BX248082.1	1.22248	0.000625659
ENSDARG00000062350	synm	1.2222	1.92495e-05
ENSDARG00000039381	ch25hl1.1	1.21841	4.41204e-05
ENSDARG00000028098	fut9d	1.21383	1.37812e-09
ENSDARG00000068934	cyp1b1	1.21204	0.00111766
ENSDARG00000112674	AL954682.1	1.2047	1.68595e-08
ENSDARG00000076348	mylk3	1.20378	1.54363e-05
ENSDARG00000093052	c6	1.20308	0.0135891
ENSDARG00000045544	hgfa	1.20003	3.74828e-06
ENSDARG00000114589	jam3a	1.19898	0.00632051
ENSDARG00000033172	nr2f5	1.19656	2.56922e-10
ENSDARG00000079305	hbae3	1.19636	4.66887e-06
ENSDARG00000101199	rbp4	1.19559	2.02498e-10
ENSDARG00000013317	pygmb	1.19446	1.99319e-10
ENSDARG00000104836	myom1b	1.18954	4.78176e-11
ENSDARG00000054451	loxl1	1.18721	3.50266e-12
ENSDARG00000071562	mtus1a	1.1861	2.64881e-05
ENSDARG00000067824	cntnap3	1.18516	0.0117376
ENSDARG00000041078	chka	1.18314	0.00809619
ENSDARG00000061165	slc6a4a	1.18294	2.6056e-09
ENSDARG00000056108	ndufa4	1.18068	3.1145e-05
ENSDARG00000029905	phyhd1	1.17009	0.0485198
ENSDARG00000052011	rrad	1.16831	2.90786e-06
ENSDARG00000023228	vsnl1a	1.16571	0.0366686
ENSDARG00000055498	si:ch1073-184j22.1	1.16412	0.00865312
ENSDARG00000035056	fgf13a	1.15648	0.00134152
ENSDARG00000061371	cdh18a	1.15282	0.0200941
ENSDARG00000100968	si:ch211-1a19.3	1.14074	0.00317778
ENSDARG00000044924	gdf11	1.13901	0.0270905
ENSDARG00000104441	hspb7	1.13898	6.49455e-07
ENSDARG00000094488	BX510923.1	1.13688	0.029938
ENSDARG00000091834	si:ch211-198m17.1	1.1319	0.0387399
ENSDARG00000014907	htra1b	1.12363	3.72475e-05
ENSDARG00000042213	si:ch211-233h19.2	1.11695	9.43416e-06
ENSDARG00000077341	ppp1r14c	1.10503	1.34399e-08
ENSDARG00000016999	lin28a	1.10302	0.000153062
ENSDARG00000030905	cited2	1.10018	2.15887e-06
ENSDARG00000038139	pdgfbb	1.09167	0.0163008
ENSDARG00000071090	actn2b	1.08902	3.99355e-09
ENSDARG00000005842	cd9a	1.08864	3.85564e-05
ENSDARG00000007990	wt1b	1.0876	0.00521685
ENSDARG00000014233	sept8b	1.08734	0.0152363
ENSDARG00000075158	igdcc3	1.08699	9.12367e-08
ENSDARG00000012390	kcnk5b	1.08406	4.49688e-05
ENSDARG00000027088	ptgdsb.1	1.08259	0.00641603
ENSDARG00000077847	olfm2a	1.08172	0.0217207
ENSDARG00000042410	rab40b	1.07737	0.0213945
ENSDARG00000104442	aatkb	1.07098	0.00116551
ENSDARG00000062632	duox	1.06716	0.00603251
ENSDARG00000033201	zgc:101840	1.06589	1.95993e-07
ENSDARG00000004930	lmo7a	1.06375	2.16846e-08
ENSDARG00000009550	foxi3b	1.06338	0.00222461
ENSDARG00000045302	smpx	1.06268	2.179e-06
ENSDARG00000061796	rasgrp4	1.05999	0.00693154
ENSDARG00000099200	zgc:123103	1.05812	0.0253979
ENSDARG00000074526	zbtb16b	1.05597	0.0136546
ENSDARG00000100691	prss35	1.05553	3.76385e-10
ENSDARG00000055843	cdh10a	1.05511	0.015713
ENSDARG00000057975	plcd4a	1.05496	0.0308391
ENSDARG00000029544	id2b	1.05414	8.4912e-06
ENSDARG00000086724	im:7151449	1.05051	0.0318796
ENSDARG00000045864	lmod2b	1.04714	4.19692e-06
ENSDARG00000044975	krt94	1.04325	2.05597e-08
ENSDARG00000035552	agtr2	1.04093	0.00841106
ENSDARG00000014673	fzd9b	1.03932	1.81274e-07
ENSDARG00000103747	cav1	1.03295	1.54077e-10
ENSDARG00000017168	nr2f1b	1.02905	9.70729e-06
ENSDARG00000035322	myh7bb	1.02849	1.02664e-09
ENSDARG00000058285	cpt1b	1.01559	0.0286239
ENSDARG00000012625	prkag2a	1.01548	3.88475e-05
ENSDARG00000031698	mylk2	1.01433	2.27173e-05
ENSDARG00000035005	bag2	1.006	0.000881014
ENSDARG00000039099	aep1	0.999592	4.46902e-08
ENSDARG00000000588	grasp	0.995086	0.000767089
