# Supplementary material for: Endothelial TGF-β signaling instructs smooth muscle cell development in the cardiac outflow tract
Source: eLife. 2020 Sep 29;9:e57603. doi: 10.7554/eLife.57603 (PMC7524555; doi:10.7554/eLife.57603)
Supplement: Supplementary file 2. [file elife-57603-supp2.xlsx]

## Sheet: Ct values
Supplemental Table 2: Ct values of genes by RT-qPCR
gene	alk5a+/+	alk5a-/-	alk5b+/+	alk5b-/-
alk5a	30.6451	34.3732	25.857	26.8029	Fig. 1 - figure supplement 1F
alk5b	23.0935	23.8579	22.3495	24.2184
gene	alk5+/+	alk5-/-	alk5-/-+Tg
fbln5	25.1231	24.6551			Fig. 6 - figure supplement 1E
sema3d	26.3	27.2673
efemp2b	28.7758	28.8383
hmcn1	28.7881	28.9626
lum	24.5343	23.9583
alk5b	26.6649	27.354	27.9762		Fig. 6 - figure supplement 2C
fbln5	25.1	24.7	26.3

## Sheet: Figure 1- figure supplement 1
Figure 1 - figure supplement 1F
alk5a in alk5a-/- vs alk5a+/+			alk5b in alk5a-/- vs alk5a+/+			alk5a in alk5b-/- vs alk5b+/+			alk5b in alk5b-/- vs alk5b+/+
Column B	alk5a -/-		Column D	alk5a -/-		Column F	alk5b -/-		Column H	alk5b -/-
vs.	vs,		vs.	vs,		vs.	vs,		vs.	vs,
Column A	alk5a +/+		Column C	alk5a +/+		Column E	alk5b +/+		Column G	alk5b +/+
Mann Whitney test			Mann Whitney test			Mann Whitney test			Mann Whitney test
P value	0.0286		P value	0.3429		P value	0.0079		P value	0.381
Exact or approximate P value?	Exact		Exact or approximate P value?	Exact		Exact or approximate P value?	Exact		Exact or approximate P value?	Exact
P value summary	*		P value summary	ns		P value summary	**		P value summary	ns
Significantly different? (P < 0.05)	Yes		Significantly different? (P < 0.05)	No		Significantly different? (P < 0.05)	Yes		Significantly different? (P < 0.05)	No
One- or two-tailed P value?	Two-tailed		One- or two-tailed P value?	Two-tailed		One- or two-tailed P value?	Two-tailed		One- or two-tailed P value?	Two-tailed
Sum of ranks in column A,B	26 , 10		Sum of ranks in column C,D	22 , 14		Sum of ranks in column E,F	40 , 15		Sum of ranks in column G,H	32 , 23
Mann-Whitney U	0		Mann-Whitney U	4		Mann-Whitney U	0		Mann-Whitney U	8
Difference between medians			Difference between medians			Difference between medians			Difference between medians
Median of column A	0,9950, n=4		Median of column C	1,037, n=4		Median of column E	1,003, n=5		Median of column G	1,037, n=5
Median of column B	0,2150, n=4		Median of column D	0,7933, n=4		Median of column F	0,2500, n=5		Median of column H	0,9033, n=5
Difference: Actual	-0.78		Difference: Actual	-0.2433		Difference: Actual	-0.7533		Difference: Actual	-0.1333
Difference: Hodges-Lehmann	-0.78		Difference: Hodges-Lehmann	-0.21		Difference: Hodges-Lehmann	-0.7533		Difference: Hodges-Lehmann	-0.1567

## Sheet: Figure 6- figure supplement 1E
Figure 6 - figure supplement 1E
fbln5			efemp2b			sema3d			hmcn1			lum
Column B	alk5-/-		Column D	alk5-/-		Column F	alk5-/-		Column H	alk5-/-		Column J	alk5-/-
vs.	vs,		vs.	vs,		vs.	vs,		vs.	vs,		vs.	vs,
Column A	alk5+/+		Column C	alk5+/+		Column E	alk5+/+		Column G	alk5+/+		Column I	alk5+/+
Mann Whitney test			Mann Whitney test			Mann Whitney test			Mann Whitney test			Mann Whitney test
P value	0.0286		P value	0.0286		P value	0.0286		P value	0.0286		P value	0.0286
Exact or approximate P value?	Exact		Exact or approximate P value?	Exact		Exact or approximate P value?	Exact		Exact or approximate P value?	Exact		Exact or approximate P value?	Exact
P value summary	*		P value summary	*		P value summary	*		P value summary	*		P value summary	*
Significantly different? (P < 0.05)	Yes		Significantly different? (P < 0.05)	Yes		Significantly different? (P < 0.05)	Yes		Significantly different? (P < 0.05)	Yes		Significantly different? (P < 0.05)	Yes
One- or two-tailed P value?	Two-tailed		One- or two-tailed P value?	Two-tailed		One- or two-tailed P value?	Two-tailed		One- or two-tailed P value?	Two-tailed		One- or two-tailed P value?	Two-tailed
Sum of ranks in column A,B	26 , 10		Sum of ranks in column C,D	26 , 10		Sum of ranks in column E,F	26 , 10		Sum of ranks in column G,H	26 , 10		Sum of ranks in column I,J	26 , 10
Mann-Whitney U	0		Mann-Whitney U	0		Mann-Whitney U	0		Mann-Whitney U	0		Mann-Whitney U	0
Difference between medians			Difference between medians			Difference between medians			Difference between medians			Difference between medians
Median of column A	0,9600, n=4		Median of column C	1,080, n=4		Median of column E	0,9700, n=4		Median of column G	0,9650, n=4		Median of column I	1,045, n=4
Median of column B	0,4750, n=4		Median of column D	0,3750, n=4		Median of column F	0,6250, n=4		Median of column H	0,5200, n=4		Median of column J	0,5200, n=4
Difference: Actual	-0.485		Difference: Actual	-0.705		Difference: Actual	-0.345		Difference: Actual	-0.445		Difference: Actual	-0.525
Difference: Hodges-Lehmann	-0.51		Difference: Hodges-Lehmann	-0.665		Difference: Hodges-Lehmann	-0.41		Difference: Hodges-Lehmann	-0.44		Difference: Hodges-Lehmann	-0.495

## Sheet: Figure 6 - figure supplement 2C
Figure 6 - figure supplement 2C
alk5b								fbln5
Number of families	1							Number of families	1
Number of comparisons per family	2							Number of comparisons per family	2
Alpha	0.05							Alpha	0.05
Dunn's multiple comparisons test	Mean rank diff,	Significant?	Summary	Adjusted P Value	A-?			Dunn's multiple comparisons test	Mean rank diff,	Significant?	Summary	Adjusted P Value	D-?
alk5+/+ vs. alk5-/-	8	Yes	**	0.0033	B	alk5-/-		alk5+/+ vs. alk5-/-	7	Yes	*	0.0121	E	alk5-/-
alk5+/+ vs. alk5-/- +Tg	4	No	ns	0.2321	C	alk5-/- +Tg		alk5+/+ vs. alk5-/- +Tg	5	No	ns	0.0997	F	alk5-/- +Tg
Test details	Mean rank 1	Mean rank 2	Mean rank diff,	n1	n2			Test details	Mean rank 1	Mean rank 2	Mean rank diff,	n1	n2
alk5+/+ vs. alk5-/-	10.5	2.5	8	4	4			alk5+/+ vs. alk5-/-	10.5	3.5	7	4	4
alk5+/+ vs. alk5-/- +Tg	10.5	6.5	4	4	4			alk5+/+ vs. alk5-/- +Tg	10.5	5.5	5	4	4
Kruskal-Wallis test								Kruskal-Wallis test
P value								P value	0.0048
Exact or approximate P value?								Exact or approximate P value?	Exact
P value summary								P value summary	**
Do the medians vary signif. (P < 0.05)								Do the medians vary signif. (P < 0.05)	Yes
Number of groups								Number of groups	3
Kruskal-Wallis statistic								Kruskal-Wallis statistic	8
Data summary								Data summary
Number of treatments (columns)								Number of treatments (columns)	3
Number of values (total)								Number of values (total)	12
