# Supplementary material for: Endothelial TGF-β signaling instructs smooth muscle cell development in the cardiac outflow tract
Source: eLife. 2020 Sep 29;9:e57603. doi: 10.7554/eLife.57603 (PMC7524555; doi:10.7554/eLife.57603)
Supplement: Supplementary file 3. [file elife-57603-supp3.xlsx]

## Sheet: Sheet1
Supplemental Table 3: RT-PCR primer sequences
primer	sequence
alk5b fw	GCACCACACTCAAAGACCTG
alk5b rv	CCCTTACCGATGCTCTCCTG
alk5a fw	CACCCATTCCTTGCTGATGG
alk5a rv	CCTTCCCAATGCTCTCTTGG
rpl13 fw	AATTGTGGTGGTGAGGTG
rpl13 rv	GGTTGGTGTTCATTCTCTTG
fbln5 fw	CTGTGAAGACCTCAATGAATGTG
fbln5 rv	CCGACAAGCAGGATTCTCAG
sema3d fw	GTGCTCCAGATACATCCCAG
sema3d rv	ACATTCCTCCCTAACACATCCTC
efemp2b fw	TCATGCAATGACATCAACGA
efemp2b rv	GTAGCCTTCTGGACAAACAC
hmcn1 fw	GTGTATGTTAAAGAGCCACCA
hmcn1 rv	AAGTATAGCATTCCCTCCCAG
lum fw	AGTGTTCAACGTGTCCTCTC
lum rv	CGTCAGCTCAAACTTGTTTATCTC
